# Supplementary material for: TPhP exposure disturbs carbohydrate metabolism, lipid metabolism, and the DNA damage repair system in zebrafish liver
Source: PubMed Central journal article supplement (PMC4761896; doi:10.1038/srep21827), 2016-02-22
Supplement: srep21827-s1.pdf [file srep21827-s1.pdf]

## SUPPLEMENTARY INFORMATION

TPhP disturbed carbohydrate metabolism, lipid metabolism, and DNA damage repair system in zebrafish liver.

Zhongkun Du, Yan Zhang, Guowei Wang, Jianbiao Peng, Zunyao Wang, Shixiang Gao\*  
State Key Laboratory of Pollution Control and Resource Reuse, School of the Environment,  
Nanjing University, Nanjing, Jiangsu 210023, China

This Supplementary Information contains:

Section S1. TPhP concentration measurement during the exposure period.

Section S2. Acute toxicity test.

Figure S1. <sup>1</sup>H NMR spectra of liver aqueous extracts.

Figure S2. <sup>1</sup>H NMR spectra of liver chloroform extracts.

Table S1. List of metabolites assigned from NMR spectra.

Table S2. List of TOP 20 altered KEGG pathways by 0.050 mg/L TPhP exposure identified from transcriptomics analysis.

Table S3. List of TOP 20 altered KEGG pathways by 0.300 mg/L TPhP exposure identified from transcriptomics analysis.

Table S4. Gene-specific primer sequences used for RT-qPCR.

Table S5. RT-qPCR validation of changes in selected genes identified by RNA-Seq.

Section S1. TPhP concentration measurement during the exposure period.

Stability of TPhP concentrations during the semi-static exposure period was assessed. TPhP solutions were sampled (100 mL) at 0 h (the beginning of the exposure period), 24 h (before solution renewal and immediately after solution renewal). Three parallel samples were prepared in each treatment group. TPhP extraction was performed using the solid phase extraction (SPE) method. First, a 100 mL water sample was passed through a Poly-Sery PSD cartridge (250 mg, 6 mL, ANPEL Scientific Instrument, Shanghai). The cartridges concentrated with TPhP were then connected to the drying tube and eluted with 3 mL ethyl acetate. The extracts were concentrated with a nitrogen evaporation apparatus and redissolved using 1 mL (0.050 mg/L group) or 3 mL (0.300 mg/L group) methanol. Then, TPhP concentrations were measured with a HPLC apparatus equipped with an Agilent Eclipse XDB-C18 column (250 × 4.6 mm, 5- $\mu$ m particle size) and a UV detector (Agilent 1200). The HPLC analysis method: the mobile phase consisted of acetonitrile–water (85:15), the flow rate was 800  $\mu$ L/min, the injection volume was 20  $\mu$ L, the column temperature was 30 °C, and the detective wavelength was 210 nm. The retention time of TPhP was 6.82 min, and the recoveries of 0.050 mg/L and 0.300 mg/L samples were  $96.1 \pm 4.3\%$  and  $93.6 \pm 5.3\%$ , respectively. The results are shown in the table below. The results suggested that the TPhP concentration did not decrease considerably after 24 h under the experimental conditions and that the semi-static exposure protocol maintained a relatively stable TPhP concentration during the 7-day exposure period.

| Group      | 0h                     | 24h                       |                          |
|------------|------------------------|---------------------------|--------------------------|
|            |                        | (before solution renewal) | (After solution renewal) |
| 0.050 mg/L | $0.048 \pm 0.002$ mg/L | $0.042 \pm 0.006$ mg/L    | $0.045 \pm 0.005$ mg/L   |
| 0.300 mg/L | $0.281 \pm 0.016$ mg/L | $0.248 \pm 0.012$ mg/L    | $0.262 \pm 0.012$ mg/L   |

Section S2. Acute toxicity test.

An acute toxicity test was performed following the guidance of OECD NO. 203. After the acclimation period, vigorous and healthy adult zebrafish were selected and were randomly divided into the exposed groups and control group. Based on the preliminary experiment, TPhP was diluted into the following concentrations: 0.40, 0.50, 0.80, 1.00, 1.20, 1.50, 1.80, and 2.00 mg/L. Two liter beakers were used as the exposure containers, and each beaker contained ten adult zebrafish. Each test concentration was replicated three times. To keep exposure concentrations and water quality consistent, the exposure solutions were renewed every 24 h. External conditions during the exposure period were identical to the conditions during culture as previously mentioned. The number of dead zebrafish was calculated at 96 h. The standard of determining death was no visible breathing or no movement when the tail was touched. During the acute toxicity experiment, neither food nor aeration was provided, and dead individuals were removed immediately from the exposure solutions. The 96 h-LC<sub>50</sub> values were calculated using probit regression with  $p < 0.05$ . The 96 h-LC<sub>50</sub> value was 1.026 mg/L, with a 95% confidence limit of 0.921 – 1.155 mg/L. The raw data are shown below.

| TPhP concentration (mg/L) | Total Fish |    |    | Death |    |    | Mortality (%) |
|---------------------------|------------|----|----|-------|----|----|---------------|
|                           | 1          | 2  | 3  | 1     | 2  | 3  |               |
| 0.400                     | 10         | 10 | 10 | 0     | 1  | 1  | 6.7 ± 5.8     |
| 0.523                     | 10         | 10 | 10 | 1     | 1  | 2  | 13.3 ± 5.8    |
| 0.683                     | 10         | 10 | 10 | 2     | 3  | 2  | 23.3 ± 5.8    |
| 0.894                     | 10         | 10 | 10 | 3     | 2  | 4  | 30.0 ± 10.0   |
| 1.170                     | 10         | 10 | 10 | 6     | 7  | 4  | 56.7 ± 15.3   |
| 1.529                     | 10         | 10 | 10 | 6     | 7  | 8  | 73.3 ± 10.0   |
| 2.000                     | 10         | 10 | 10 | 9     | 10 | 10 | 96.7 ± 5.8    |

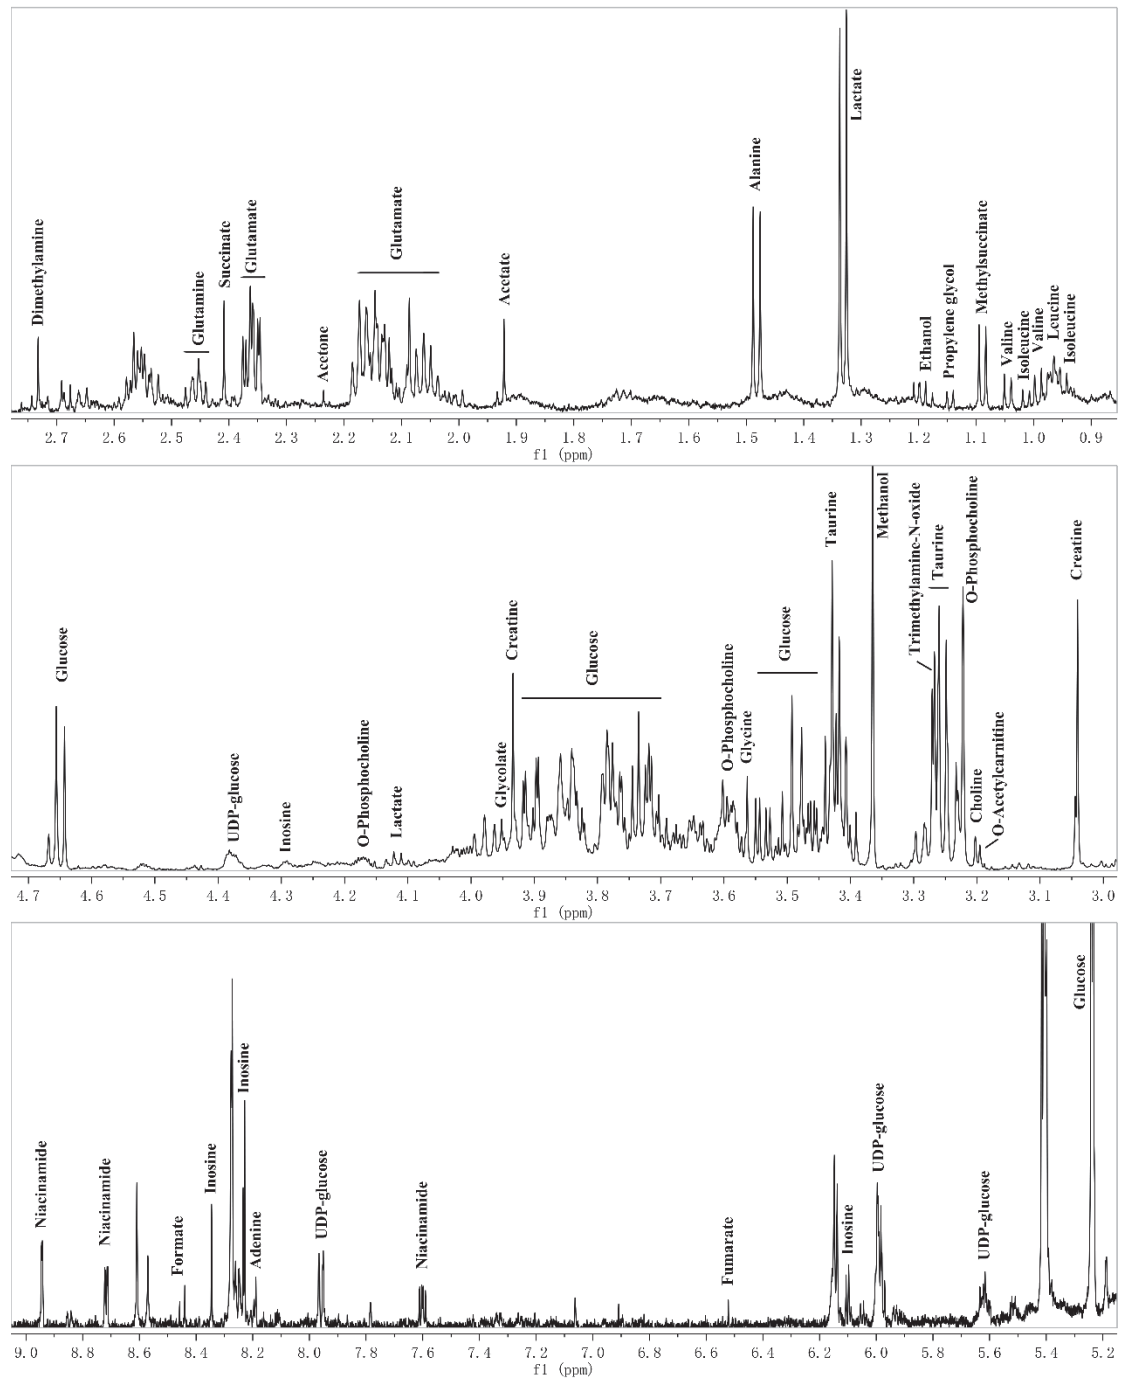

Figure S1.  $^1\text{H}$  NMR spectra of liver aqueous extracts.

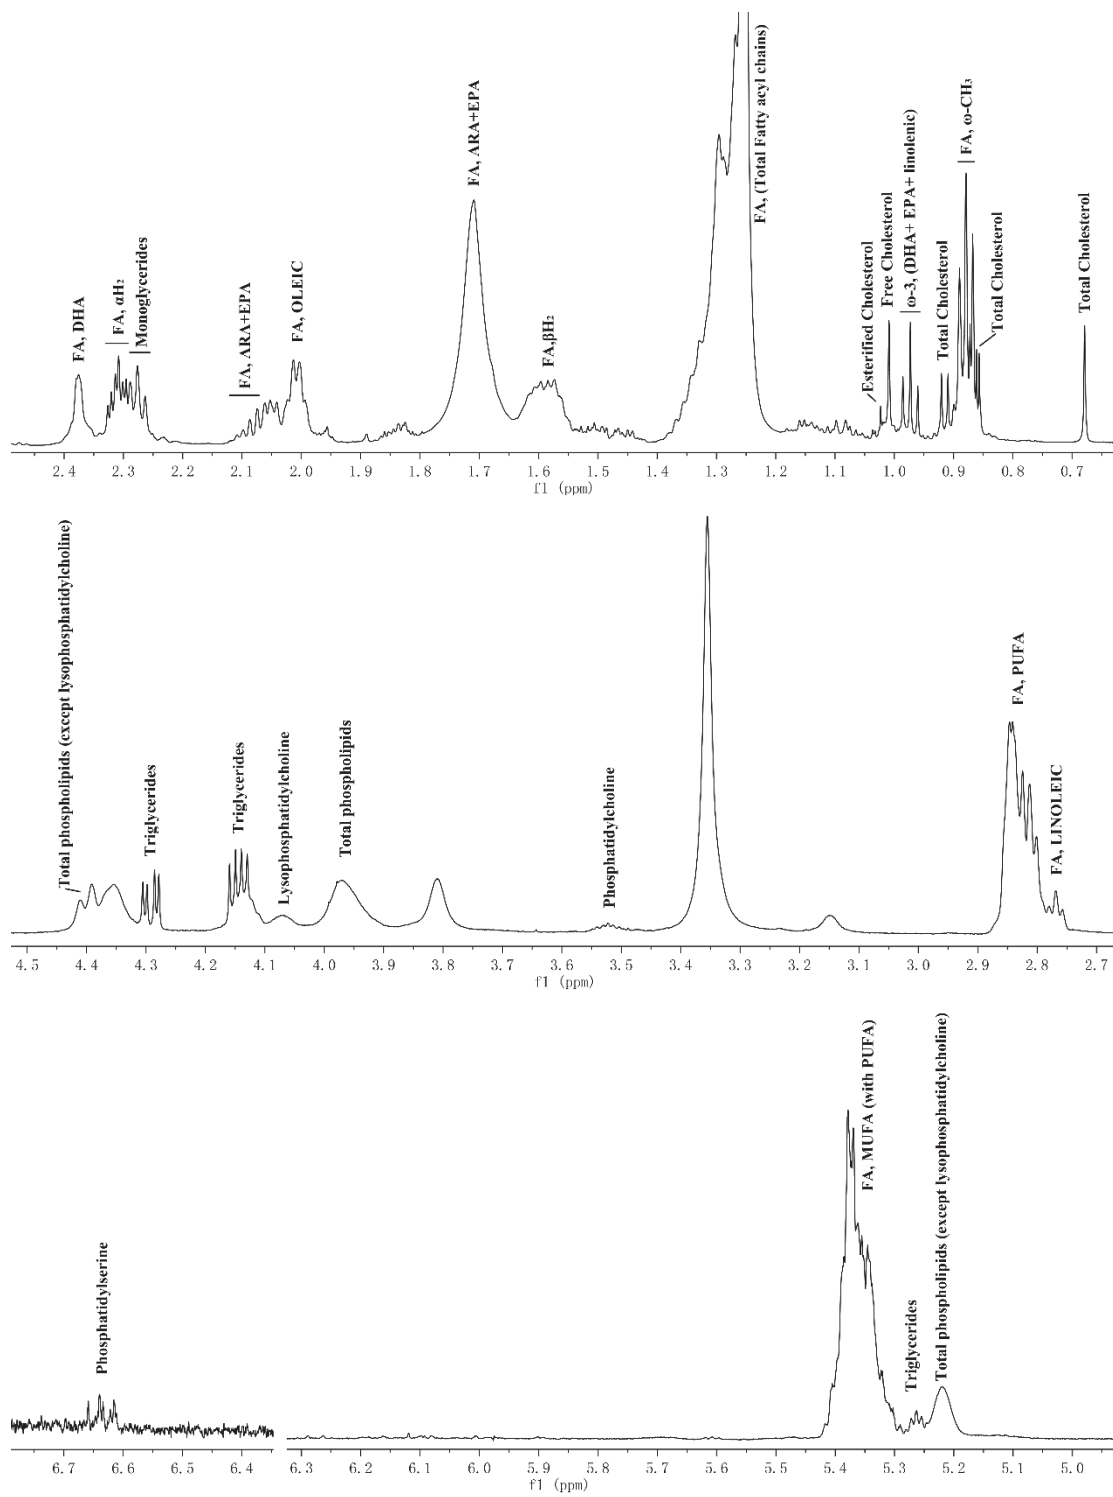

Figure S2. <sup>1</sup>H NMR spectra of liver chloroform extracts.

Table S1. List of metabolites assigned from NMR spectra.

| Metabolites                      | <sup>1</sup> H shift (ppm)                | Moieties assignment                                                                                                                                              |
|----------------------------------|-------------------------------------------|------------------------------------------------------------------------------------------------------------------------------------------------------------------|
| <b>Water-soluble metabolites</b> |                                           |                                                                                                                                                                  |
| Isoleucine                       | 0.94(d) 1.01(d)                           | δCH <sub>3</sub> , βCH <sub>3</sub>                                                                                                                              |
| Leucine                          | 0.96(t)                                   | γCH <sub>3</sub> +γCH <sub>3</sub>                                                                                                                               |
| Valine                           | 0.99(d) 1.04(d)                           | γCH <sub>3</sub>                                                                                                                                                 |
| Methylsuccinate                  | 1.09(d)                                   | CH <sub>3</sub>                                                                                                                                                  |
| Propylene glycol                 | 1.14(d)                                   | CH <sub>3</sub>                                                                                                                                                  |
| Ethanol                          | 1.19(t) 3.66(q)                           | βCH <sub>3</sub> , CH <sub>2</sub>                                                                                                                               |
| Lactate                          | 1.33(d) 4.12(dd)                          | CH <sub>3</sub> , CH                                                                                                                                             |
| Alanine                          | 1.48(d)                                   | CH <sub>3</sub>                                                                                                                                                  |
| Acetate                          | 1.92(s)                                   | CH <sub>3</sub>                                                                                                                                                  |
| Glutamate                        | 2.05(m) 2.12(m) 2.36(m)                   | Half βCH <sub>2</sub> , Half βCH <sub>2</sub> , γCH <sub>2</sub>                                                                                                 |
| Acetone                          | 2.24(s)                                   | CH <sub>3</sub>                                                                                                                                                  |
| Glutamine                        | 2.45(m)                                   | γCH <sub>2</sub>                                                                                                                                                 |
| Succinate                        | 2.41(s)                                   | (CH <sub>2</sub> ) <sub>2</sub>                                                                                                                                  |
| Dimethylamine                    | 2.73(s)                                   | CH <sub>3</sub>                                                                                                                                                  |
| Creatine                         | 3.04(s) 3.93(s)                           | N-CH <sub>3</sub> , CH <sub>2</sub>                                                                                                                              |
| Acetylcarnitine                  | 3.19(s)                                   | N(CH <sub>3</sub> ) <sub>3</sub>                                                                                                                                 |
| Choline                          | 3.20(s)                                   | N(CH <sub>3</sub> ) <sub>3</sub>                                                                                                                                 |
| Phosphocholine                   | 3.22(s) 3.59(m) 4.17(m)                   | N(CH <sub>3</sub> ) <sub>3</sub>                                                                                                                                 |
| Taurine                          | 3.26(t) 3.42(t)                           | CH <sub>2</sub> NH, CH <sub>2</sub> SO <sub>3</sub>                                                                                                              |
| Trimethylamine-N-oxide (TMAO)    | 3.27(S)                                   | N(CH <sub>3</sub> ) <sub>3</sub>                                                                                                                                 |
| Glucose                          | 3.23-3.90(m)                              | CH                                                                                                                                                               |
| Glycine                          | 3.56(s)                                   | CH <sub>2</sub>                                                                                                                                                  |
| Betaine                          | 3.90(s)                                   | NCH <sub>2</sub>                                                                                                                                                 |
| Glycolate                        | 3.95(S)                                   | αCH                                                                                                                                                              |
| Inosine                          | 4.28(dd) 4.44(t) 6.10(d) 8.23(s) 8.35 (s) | CH                                                                                                                                                               |
| UDP-glucose                      | 7.96(d)                                   | H6-ring                                                                                                                                                          |
| Fumarate                         | 6.52(s)                                   | CH=                                                                                                                                                              |
| Niacinamide                      | 7.59(m) 8.25(m) 8.71(dd) 8.94(q)          | CH                                                                                                                                                               |
| Adenine                          | 8.19(s) 8.23(s)                           | N-CH=N                                                                                                                                                           |
| Formate                          | 8.46(s)                                   | HCOO-                                                                                                                                                            |
| <b>Lipid-soluble metabolites</b> |                                           |                                                                                                                                                                  |
| Total cholesterol                | 0.69(s) 0.86(2×d) 0.92(d)                 | C18-H <sub>3</sub> , C26/27-H <sub>3</sub> , C21-H <sub>3</sub>                                                                                                  |
| FA, ω-CH <sub>3</sub>            | 0.88(t)                                   | FA chain CH <sub>3</sub> (CH <sub>2</sub> ) <sub>n</sub>                                                                                                         |
| ω-3,(DHA+EPA+Linolenic)          | 0.98(t)                                   | ω-3 CH <sub>3</sub> -CH <sub>2</sub> -C=C                                                                                                                        |
| Free cholesterol                 | 1.02(s)                                   | C19-H <sub>3</sub>                                                                                                                                               |
| Esterified cholesterol           | 1.04(s)                                   | C19-H <sub>3</sub>                                                                                                                                               |
| FA, (Total fatty acyl chains)    | 1.30(m)                                   | FA chain -(CH <sub>2</sub> ) <sub>n</sub> -                                                                                                                      |
| FA, βH <sub>2</sub>              | 1.62(m)                                   | βH <sub>2</sub> R-CH <sub>2</sub> CH <sub>2</sub> CO-OR                                                                                                          |
| FA, ARA+EPA                      | 1.70(m) 2.12(m)                           | βH <sub>2</sub> -CH=CH-CH <sub>2</sub> -CH <sub>2</sub> -CH <sub>2</sub> CO-OR<br>γH <sub>2</sub> -CH=CH-CH <sub>2</sub> -CH <sub>2</sub> -CH <sub>2</sub> CO-OR |
| FA, OLEIC                        | 2.02(m)                                   | -CH=CH-CH <sub>2</sub> -                                                                                                                                         |

|                                                      |                           |                                                                                                                                   |
|------------------------------------------------------|---------------------------|-----------------------------------------------------------------------------------------------------------------------------------|
| Monoglycerides                                       | 2.29(t)                   | FA $\alpha$ H -CH <sub>2</sub> -CO-O-C2                                                                                           |
| FA, $\alpha$ H <sub>2</sub>                          | 2.35(m)                   | $\alpha$ H <sub>2</sub> -CH <sub>2</sub> -CO-OR                                                                                   |
| FA, DHA                                              | 2.41(m)                   | $\alpha$ H <sub>2</sub> & $\beta$ H <sub>2</sub><br>-CHdCH-CH <sub>2</sub> -CH <sub>2</sub> -CO-OR                                |
| FA, LINOLEIC                                         | 2.78(t)                   | -CH=CH-CH <sub>2</sub> -(CH=CH-CH <sub>2</sub> ) <sub>n</sub> , n=1                                                               |
| FA, PUFA                                             | 2.85(m)                   | -CH=CH-CH <sub>2</sub> -(CH=CH-CH <sub>2</sub> ) <sub>n</sub> , n $\geq$ 2                                                        |
| Phosphatidylcholine                                  | 3.54(m)                   | Alkyl-PC (Phosphoether)<br>CH <sub>2</sub> -N-(CH <sub>3</sub> ) <sub>3</sub>                                                     |
| Total phospholipids                                  | 3.98(m)                   | Glycerol (C3-H <sub>2</sub> )                                                                                                     |
| Lysophosphatidylcholine                              | 4.08(m)                   | C-1 CH <sub>2</sub> -OC                                                                                                           |
| Triglycerides                                        | 4.15(dd) 4.30(dd) 5.27(q) | Glycerol (C1-H <sup>a</sup> ) & (C3-H <sup>a</sup> ),<br>Glycerol (C1-H <sup>d</sup> ) & (C3-H <sup>d</sup> ),<br>Glycerol (C2-H) |
| Total phospholipids (except lysophosphatidylcholine) | 4.40(m) 5.22(qd)          | Glycerol (C1-H <sub>2</sub> ), Glycerol (C2-H)                                                                                    |
| FA, MUFA (with PUFA)                                 | 5.36(m)                   | -CH=CH-                                                                                                                           |
| Phosphatidylserine                                   | 6.64(m)                   | NH <sub>3</sub> + -CH-COO                                                                                                         |

Table S2. List of TOP 20 altered KEGG pathways by 0.050 mg/L TPhP exposure identified from transcriptomics analysis.

| #  | Pathway                                       | DEGs with pathway annotation (333) | All genes with pathway annotation (21563) | Pvalue       | Qvalue       | Pathway ID |
|----|-----------------------------------------------|------------------------------------|-------------------------------------------|--------------|--------------|------------|
| 1  | DNA replication                               | 13 (3.9%)                          | 54 (0.25%)                                | 1.411347e-12 | 2.258155e-10 | ko03030    |
| 2  | Cell cycle                                    | 21 (6.31%)                         | 216 (1%)                                  | 2.434798e-11 | 1.947838e-09 | ko04110    |
| 3  | Non-homologous end-joining                    | 8 (2.4%)                           | 25 (0.12%)                                | 2.559716e-09 | 1.365182e-07 | ko03450    |
| 4  | Salivary secretion                            | 19 (5.71%)                         | 273 (1.27%)                               | 5.582555e-08 | 2.233022e-06 | ko04970    |
| 5  | Oocyte meiosis                                | 17 (5.11%)                         | 230 (1.07%)                               | 1.192191e-07 | 3.815011e-06 | ko04114    |
| 6  | Phagosome                                     | 28 (8.41%)                         | 625 (2.9%)                                | 5.280915e-07 | 1.408244e-05 | ko04145    |
| 7  | Progesterone-mediated oocyte maturation       | 13 (3.9%)                          | 189 (0.88%)                               | 8.140862e-06 | 1.756794e-04 | ko04914    |
| 8  | Fatty acid elongation                         | 8 (2.4%)                           | 67 (0.31%)                                | 8.783972e-06 | 1.756794e-04 | ko00062    |
| 9  | Base excision repair                          | 8 (2.4%)                           | 71 (0.33%)                                | 1.358167e-05 | 2.414519e-04 | ko03410    |
| 10 | Tuberculosis                                  | 23 (6.91%)                         | 645 (2.99%)                               | 0.0001892478 | 2.875599e-03 | ko05152    |
| 11 | p53 signaling pathway                         | 11 (3.3%)                          | 191 (0.89%)                               | 0.0001976974 | 2.875599e-03 | ko04115    |
| 12 | Folate biosynthesis                           | 4 (1.2%)                           | 26 (0.12%)                                | 0.0006383958 | 8.511944e-03 | ko00790    |
| 13 | Complement and coagulation cascades           | 11 (3.3%)                          | 275 (1.28%)                               | 0.003825453  | 4.708250e-02 | ko04610    |
| 14 | Proximal tubule bicarbonate reclamation       | 5 (1.5%)                           | 72 (0.33%)                                | 0.005124703  | 5.856803e-02 | ko04964    |
| 15 | Glutathione metabolism                        | 5 (1.5%)                           | 83 (0.38%)                                | 0.00927622   | 9.894635e-02 | ko00480    |
| 16 | Renin-angiotensin system                      | 3 (0.9%)                           | 35 (0.16%)                                | 0.01658405   | 1.658405e-01 | ko04614    |
| 17 | Fat digestion and absorption                  | 5 (1.5%)                           | 101 (0.47%)                               | 0.02026400   | 1.907200e-01 | ko04975    |
| 18 | Glycosphingolipid biosynthesis - globo series | 3 (0.9%)                           | 41 (0.19%)                                | 0.02524986   | 2.194395e-01 | ko00603    |
| 19 | Arginine and proline metabolism               | 6 (1.8%)                           | 146 (0.68%)                               | 0.02605844   | 2.194395e-01 | ko00330    |
| 20 | Amino sugar and nucleotide sugar metabolism   | 7 (2.1%)                           | 196 (0.91%)                               | 0.03299972   | 2.590526e-01 | ko00520    |

Pathways with Q value < 0.05 are significantly enriched in DEGs.



Table S3. List of TOP 20 altered KEGG pathways by 0.300 mg/L TPhP exposure identified from transcriptomics analysis.

| #  | Pathway                                          | DEGs with pathway annotation (264) | All genes with pathway annotation (21563) | Pvalue       | Qvalue       | Pathway ID |
|----|--------------------------------------------------|------------------------------------|-------------------------------------------|--------------|--------------|------------|
| 1  | Phagosome                                        | 28 (10.61%)                        | 625 (2.9%)                                | 3.758622e-09 | 5.600347e-07 | ko04145    |
| 2  | Non-homologous end-joining                       | 7 (2.65%)                          | 25 (0.12%)                                | 1.516482e-08 | 8.807107e-07 | ko03450    |
| 3  | DNA replication                                  | 9 (3.41%)                          | 54 (0.25%)                                | 1.773243e-08 | 8.807107e-07 | ko03030    |
| 4  | Oocyte meiosis                                   | 15 (5.68%)                         | 230 (1.07%)                               | 1.716864e-07 | 6.395318e-06 | ko04114    |
| 5  | Salivary secretion                               | 16 (6.06%)                         | 273 (1.27%)                               | 2.849910e-07 | 8.492732e-06 | ko04970    |
| 6  | Cell cycle                                       | 14 (5.3%)                          | 216 (1%)                                  | 4.797084e-07 | 1.191276e-05 | ko04110    |
| 7  | Progesterone-mediated oocyte maturation          | 12 (4.55%)                         | 189 (0.88%)                               | 3.945557e-06 | 8.398400e-05 | ko04914    |
| 8  | Base excision repair                             | 7 (2.65%)                          | 71 (0.33%)                                | 2.596672e-05 | 4.836302e-04 | ko03410    |
| 9  | Tuberculosis                                     | 21 (7.95%)                         | 645 (2.99%)                               | 4.967419e-05 | 8.223838e-04 | ko05152    |
| 10 | Fatty acid elongation                            | 6 (2.27%)                          | 67 (0.31%)                                | 0.000169935  | 2.532031e-03 | ko00062    |
| 11 | Complement and coagulation cascades              | 9 (3.41%)                          | 275 (1.28%)                               | 0.007018853  | 9.269175e-02 | ko04610    |
| 12 | PPAR signaling pathway                           | 7 (2.65%)                          | 184 (0.85%)                               | 0.007698081  | 9.269175e-02 | ko03320    |
| 13 | Fat digestion and absorption                     | 5 (1.89%)                          | 101 (0.47%)                               | 0.0080872    | 9.269175e-02 | ko04975    |
| 14 | Proximal tubule bicarbonate reclamation          | 4 (1.52%)                          | 72 (0.33%)                                | 0.01179087   | 1.254885e-01 | ko04964    |
| 15 | Glycosphingolipid biosynthesis - globo series    | 3 (1.14%)                          | 41 (0.19%)                                | 0.01373029   | 1.363875e-01 | ko00603    |
| 16 | Vitamin digestion and absorption                 | 4 (1.52%)                          | 98 (0.45%)                                | 0.03244309   | 3.021263e-01 | ko04977    |
| 17 | Collecting duct acid secretion                   | 3 (1.14%)                          | 61 (0.28%)                                | 0.0388304    | 3.403370e-01 | ko04966    |
| 18 | Mineral absorption                               | 4 (1.52%)                          | 111 (0.51%)                               | 0.04766973   | 3.945994e-01 | ko04978    |
| 19 | Glycosphingolipid biosynthesis - ganglio series  | 2 (0.76%)                          | 30 (0.14%)                                | 0.05188978   | 4.069251e-01 | ko00604    |
| 20 | Glycosaminoglycan biosynthesis - keratan sulfate | 2 (0.76%)                          | 32 (0.15%)                                | 0.05823893   | 4.338800e-01 | ko00533    |

Pathways with Q value < 0.05 are significantly enriched in DEGs.

Table S4. Gene-specific primer sequences used for RT-qPCR.

| Gene                    | Forward primer (5'-3') | Reverse primer (5'-3') | T <sub>m</sub> (°C) |
|-------------------------|------------------------|------------------------|---------------------|
| β-actin (NM_131031.1)   | AGATGGGAACCGCTGCCTCTT  | GTGGTCTCGTGGATACCGCAA  | 59                  |
| elovl7b (NM_199778.1)   | GGCTAACGGCTACACCTAC    | CCTCAGCACGAAGAACAC     | 59                  |
| faah2b (NM_001077462.1) | ACCCCTCTCACCTCTTC      | TCGCTCCTTACTCAACCC     | 59                  |
| fen1 (NM_198820.1)      | CGGTTTATGTGTTTGATGG    | TGCTCACCTGCTTCTTGT     | 59                  |
| cyp7a1a (NM_201173.2)   | TTGCGCATGCTTTTGAACGA   | TCAAAGGTTGCGCTCACCTC   | 59                  |
| tpi1b (NM_153668.4)     | ATCGCCTGCATTGGTGAGAA   | GAGCTTGCATGCACCTCCT    | 59                  |
| cyp11a1 (NM_152953.2)   | GAGGGCCATCACCCAATAG    | GTCTTCCAGGCCTTCCCTTC   | 59                  |

Table S5. RT-qPCR validation of changes in selected genes identified by RNA-Seq.

| Gene    | RNA-Seq    |            | RT-qPCR    |            |
|---------|------------|------------|------------|------------|
|         | 0.050 mg/L | 0.300 mg/L | 0.050 mg/L | 0.300 mg/L |
| elovl7b | -8.0       | -4.1       | -7.2±0.4   | -5.1±0.3   |
| faah2b  | -8.9       | -5.2       | -6.9±0.2   | -4.2±0.1   |
| fen1    | -7.4       | -6.0       | -7.0±0.3   | -5.8±0.2   |
| cyp7a1a | -2.6       | -3.7       | -2.2±0.4   | -2.4±0.5   |
| tpi1b   | -6.1       | -3.8       | -5.5±0.6   | -2.4±0.4   |
| cyp11a1 | -9.1       | -5.4       | -8.5±0.2   | -6.0±0.3   |

Change of gene expression are expressed in  $\log_2(\text{sample}/\text{control})$ . Fold changes of these genes were similar by using these two inspect method, indicating that the RNA-Seq analysis was credible. Furthermore, since total mRNA samples used in RNA-Seq and RT-qPCR were collected from two parallel exposure, the similar result meaning that TPHP-induced transcriptomics alterations are inerratic.

Table S6. Change fold of specific DEGs mentioned in “discussion”.

| DEGs    | Full name                                                       | 0.050 mg/L  |             | 0.300 mg/L  |             | Related pathways (incomplete)               | Category                        |
|---------|-----------------------------------------------------------------|-------------|-------------|-------------|-------------|---------------------------------------------|---------------------------------|
|         |                                                                 | Fold change | Probability | Fold change | Probability |                                             |                                 |
| CFTR8   | ATP-binding cassette subfamily C member 8                       | -5.3        | 0.84        | -1.0        | 0.12        | Type II diabetes mellitus                   | Carbohydrate metabolism         |
| INS     | insulin                                                         | 1.6         | 0.70        | 3.7         | 0.89        | Type II diabetes mellitus                   |                                 |
| tpiA    | triosephosphate isomerase                                       | -6.1        | 0.89        | -3.8        | 0.81        | Glycolysis / Gluconeogenesis                |                                 |
| sdhda   | succinate dehydrogenase                                         | -2.5        | 0.81        | -5.5        | 0.85        | Citrate cycle                               |                                 |
| fuk     | fucokinase                                                      | -8.1        | 0.87        | -8.1        | 0.87        | Fructose and mannose metabolism             |                                 |
| bdh     | 3-hydroxybutyrate dehydrogenase                                 | -4.1        | 0.89        | -2.8        | 0.80        | Butanoate metabolism                        |                                 |
| siat4a  | sialyltransferase 4A                                            | -8.7        | 0.90        | -8.7        | 0.91        | Glycan biosynthesis and metabolism          |                                 |
| gbgt1l4 | globoside alpha-1,3-N-acetylgalactosaminyltransferase 1, like 4 | -9.2        | 0.94        | -3.9        | 0.85        | Glycan biosynthesis and metabolism          |                                 |
| chiA    | chitinase                                                       | -6.5        | 0.99        | -7.7        | 0.99        | Amino sugar and nucleotide sugar metabolism |                                 |
| chs1    | chitin synthase                                                 | -5.5        | 0.91        | -3.2        | 0.80        | Amino sugar and nucleotide sugar metabolism |                                 |
| ppt     | palmitoyl-protein thioesterase                                  | -9.5        | 0.95        | -3.3        | 0.83        | Fatty acid metabolism                       | Lipid and fatty acid metabolism |
| elovl6  | elongation of very long chain fatty acids protein 6             | -5.2        | 0.89        | -2.5        | 0.83        | Fatty acid metabolism                       |                                 |
| elovl7  | elongation of very long chain fatty acids protein 7             | -8.0        | 0.87        | -4.9        | 0.83        | Fatty acid metabolism                       |                                 |
| cyp11a  | cytochrome P450, family 11, subfamily A                         | -9.1        | 0.93        | -5.4        | 0.90        | Steroid hormone biosynthesis                |                                 |
| cyp7a1  | cholesterol 7alpha-monooxygenase                                | -2.6        | 0.83        | -3.7        | 0.88        | Steroid hormone biosynthesis                |                                 |
| cyp17a1 | cytochrome P450, family 17, subfamily A, polypeptide 1          | -7.3        | 0.80        | -2.1        | 0.61        | Steroid hormone biosynthesis                |                                 |
| cyp1a2  | cytochrome P450, family 1, subfamily A, polypeptide 2           | 1.0         | 0.66        | 3.3         | 0.88        | Steroid hormone biosynthesis                |                                 |
| cyp2b   | cytochrome P450, family 2, subfamily B                          | -0.2        | 0.27        | 2.0         | 0.80        | Steroid hormone biosynthesis                |                                 |
| amiE    | amidase                                                         | -8.9        | 0.92        | -5.2        | 0.89        | Arginine and proline metabolism             | Amino acid metabolism           |
| aoc1    | diamine oxide                                                   | -8.1        | 0.88        | -3.2        | 0.75        | Arginine and proline metabolism             |                                 |
| dnmt1   | DNA (cytosine-5)-methyltransferase 1                            | -3.5        | 0.84        | -3.3        | 0.82        | Cysteine and methionine metabolism          |                                 |
| ash1l   | histone-lysine N-methyltransferase                              | -4.3        | 0.86        | -4.6        | 0.86        | Lysine degradation                          |                                 |

|         |                                                 |       |      |      |      |                                           |                       |
|---------|-------------------------------------------------|-------|------|------|------|-------------------------------------------|-----------------------|
| rrm1    | ribonucleoside-diphosphate reductase subunit M1 | -8.4  | 0.89 | -5.1 | 0.86 | Glutathione metabolism                    | Amino acid metabolism |
| anpep   | amino peptidase N                               | -4.8  | 0.85 | -2.1 | 0.69 | Glutathione metabolism                    |                       |
| fmo5    | flavin monooxygenase 5                          | -2.5  | 0.81 | -2.8 | 0.83 | Xenobiotics biodegradation and metabolism | TMAO metabolism       |
| CHK2    | serine/threonine-protein kinase                 | -4.6  | 0.83 | -3.1 | 0.74 | p53 signaling pathway                     | Signaling pathway     |
| Scotin  | scotin                                          | -8.4  | 0.89 | -3.3 | 0.77 | p53 signaling pathway                     |                       |
| p53R2   | ribonucleoside-diphosphate reductase subunit M2 | -8.4  | 0.89 | -5.1 | 0.86 | p53 signaling pathway                     |                       |
| KAI     | CD82 antigen                                    | -8.4  | 0.90 | -3.7 | 0.89 | p53 signaling pathway                     |                       |
| ccnB    | cyclin B                                        | -10.7 | 0.97 | -3.5 | 0.85 | p53 signaling pathway                     |                       |
| ccnE    | cyclin E                                        | -5.2  | 0.87 | -2.5 | 0.73 | p53 signaling pathway                     |                       |
| Gadd45  | growth arrest and DNA-damage-inducible protein  | -0.8  | 0.60 | -2.5 | 0.83 | p53 signaling pathway                     |                       |
| FATCD36 | CD36 antigen                                    | -7.0  | 0.92 | -6.1 | 0.91 | PPAR signaling pathway                    |                       |
| FABP1   | fatty acid-binding protein 1                    | -8.2  | 0.88 | -8.2 | 0.87 | PPAR signaling pathway                    |                       |
| LPL     | lipoprotein lipase                              | -1.6  | 0.72 | -3.6 | 0.85 | PPAR signaling pathway                    |                       |
| PGAR    | angiotensin-like 4                              | 3.2   | 0.88 | 3.7  | 0.90 | PPAR signaling pathway                    |                       |

Fold changes of DEGs are expressed in  $\log_2(\text{sample/control})$ .
